# Supplementary material
Source: publisher site journal article supplement (https://www.dovepress.com/article/377093)
Supplement: Supplementary file 1 [file get_supplementary_file.php]

**SUPPLEMENTARY MATERIAL**

**Oncology Simulation Model: A Comprehensive and Innovative Approach to Estimate and Project Prevalence and Survival in Oncology**

Brian Bloudek1, Heidi S Wirtz2, Zsolt Hepp2, Jack Timmons1, Lisa Bloudek1, Caroline McKay3, Matthew D Galsky4

1Curta Inc., Seattle, WA, USA; 2Seagen Inc., Bothell, WA, USA; 3Astellas Pharma Global Development, Inc., Northbrook, IL, USA; 4Tisch Cancer Institute, Icahn School of Medicine at Mount Sinai, NY, USA.

**CONTENTS**

**Figure S1**. OSM Model Validation: 5-Year Overall Survival

**Table S1.** Epidemiology Terminology Definitions(Weiss NS, Koepsell TD. 2014)30

**Table S2.** Bladder Cancer OSM Inputs: Demographicsa

**Table S3.** Bladder Cancer OSM Inputs: NMIBC Treatment Patternsa

**Table S4.** Bladder Cancer OSM Inputs: NMIBC Treatment Efficacya

**Table S5.** Bladder Cancer OSM Inputs: MIBC Treatment Patternsa

**Table S6.** Bladder Cancer OSM Inputs: MIBC Treatment Efficacya

**Table S7.** Bladder Cancer OSM Inputs: la/mUC Treatment Ratesa

**Table S8.** Bladder Cancer OSM Inputs: la/mUC 1L Treatment Patternsa

**Table S9.** Bladder Cancer OSM Inputs: la/mUC 1L Treatment Efficacya

**Table S10.** Bladder Cancer OSM Inputs: la/mUC 2L Treatment Patternsa

**Table S11.** Bladder Cancer OSM Inputs: la/mUC 2L Treatment Efficacya

**Table S12.** Bladder Cancer OSM Inputs: la/mUC 3L Treatment Patternsa

**Table S13**. Bladder Cancer OSM Inputs: la/mUC 3L Treatment Efficacya

**Figure S1.** OSM Model Validation: 5-Year Overall Survivala


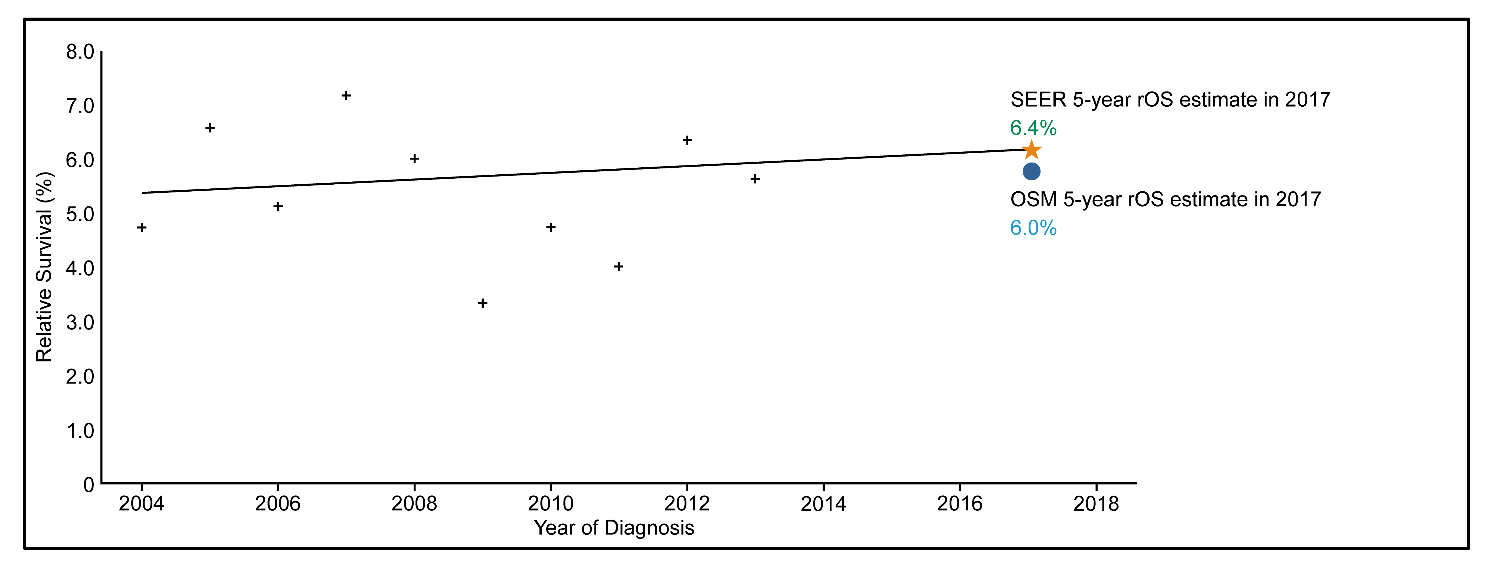


**Note:** aComparison between the OSM and SEER using published data from the SEER program. Data from National Cancer Institute.24

**Abbreviations:** OSM, oncology simulation model; SEER, Surveillance, Epidemiology, and End Results program; 5-year rOS, 5-year relative overall survival.

**Table S1.** Epidemiology Terminology Definitions (Weiss NS, Koepsell TD. 2014)

| **Terminology** | **Definition** |
| --- | --- |
| Incidence | Frequency of new cases for a specific disease in a population over a specified period of time. |
| Point prevalence | Number of current cases of a specific disease at a specific point in time. |
| Period prevalence | Number of current cases of a specific disease, both new and pre-existing, during a specific period of time. |
| Treated prevalence | The proportion of the prevalent population receiving treatment for a specific disease. |
| Progression-free survival | The length of time during and after the treatment of a specific disease that a patient lives with the disease but does not progress. |
| Overall survival | The length of time from either the date of diagnosis or the start of treatment for a specific disease that patients diagnosed with the disease are still alive. |
| Relative survival | The survival rate of the population with a specific disease divided by survival rate of the general population with identical gender, race, and age composition over a specific time period. |

**Notes:** Data from Weiss NS, Koepsell TD. *Epidemiologic Methods: Studying the Occurrence of Illness.* Oxford, UK: Oxford University Press; 2014.30**Table S2.** Bladder Cancer OSM Inputs: Demographicsa

| **Parameter** | **Value** | **Source** |
| --- | --- | --- |
| Population | 332,639,102 | The World Factbook 202031 |
| Bladder cancer prevalence | 25.2 per 100,000 | Ferlay 202022 |
| Urothelial carcinoma proportion among bladder cancer | 93% | Bamias 201832 |
| Proportion male | 78% | Ferlay 202022 |
| Stage at diagnosis | NMIBC: 68%  MIBC: 20%  la/mUC: 12% | Ghatalia 201823  SEER: Bladder Cancer 201824 |
| Median age, years | 72.3 | Kamat 202033 |
| Cisplatin eligibility in MIBC | 60% | Canter 201134 |
| Cisplatin eligibility in la/mUC | 45% | Flannery 201925 |

**Note:** aOnline only.

**Abbreviations:** la/mUC, locally advanced or metastatic urothelial carcinoma; MIBC, muscle-invasive bladder cancer; NMIBC, non-muscle-invasive bladder cancer; OSM, oncology simulation model; SEER, Surveillance, Epidemiology, and End Results.

**Table S3.** Bladder Cancer OSM Inputs: NMIBC Treatment Patternsa

| **Parameter** | **Value** | **Source** |
| --- | --- | --- |
| NMIBC treatment rate | 100% | Assumption |
| **NMIBC distribution by risk stratification** | | |
| Low risk | 49% | Ravvaz 201735 |
| High risk | 51% | Ravvaz 201735 |
| **Treatment patterns** | | |
| Initial TURBT | 100% | Assumption |
| Repeat TURBT + BCG | 80% | Nielsen 201236 |
| Repeat TURBT + mitomycin | 20% | Nielsen 201236 |
| Repeat TURBT alone | 0% | Assumption |

**Note:** aOnline only.

**Abbreviations:** BCG, bacillus Calmette-Guérin; NMIBC, non-muscle-invasive bladder cancer; OSM, oncology simulation model; TURBT, transurethral resection of the bladder tumor.

**Table S4.** Bladder Cancer OSM Inputs: NMIBC Treatment Efficacya

| **Treatment** | **PFS** | **Source** | **OS** | **Source** |
| --- | --- | --- | --- | --- |
| Initial TURBT | 55% at 60 months | Sylvester 201637 | 50% at 157 months | Sylvester 201637 |
| Repeat TURBT + BCGb | 76% at 60 months | Lamm 200038 | 83% at 60 months | Lamm 200038 |
| Repeat TURBT + mitomycin | 64% at 58 months | Malmstrom 200939 | 76% at 58 months | Malmstrom 200939 |
| Repeat TURBT alone | 55% at 60 months | Sylvester 201637 | 50% at 157 months | Sylvester 201637 |

**Notes:** aOnline only. bBCG treatment is assumed to incorporate maintenance BCG despite known limitations in the global supply.

**Abbreviations:** BCG, bacillus Calmette-Guérin; NMIBC, non-muscle-invasive bladder cancer; OS, overall survival; OSM, oncology simulation model; PFS, progression-free survival; TURBT, transurethral resection of the bladder tumor.

**Table S5.** Bladder Cancer OSM Inputs: MIBC Treatment Patternsa

| Treatment | Value | Source |
| --- | --- | --- |
| MIBC treatment rate | 75% | KOL input 2020 |
| Cisplatin eligible |  |  |
| Neoadjuvant chemo + radical cystectomy | 12.6% | KOL input 2020;  Rose 201640 |
| Neoadjuvant and adjuvant chemo + radical cystectomy | 1.5% | KOL input 2020;  Rose 201640 |
| Radical cystectomy alone | 33.2% | KOL input 2020;  Rose 201640 |
| Adjuvant chemo + radical cystectomy | 0.9% | KOL input 2020;  Rose 201640 |
| Neoadjuvant chemo + partial cystectomy | 1.8% | KOL input 2020;  Rose 201640 |
| Bladder-preserving therapy & cisplatin-based CCRT | 11.4% | KOL input 2020;  Rose 201640 |
| Cisplatin ineligible |  |  |
| Neoadjuvant chemo + radical cystectomy | 4.9% | KOL input 2020;  Rose 201640 |
| Neoadjuvant and adjuvant chemo + radical cystectomy | 0.5% | KOL input 2020;  Rose 201640 |
| Radical cystectomy alone | 18.4% | KOL input 2020;  Rose 201640 |
| Adjuvant chemo + radical cystectomy | 2.6% | KOL input 2020;  Rose 201640 |
| Neoadjuvant chemo + partial cystectomy | 1.1% | KOL input 2020;  Rose 201640 |
| Bladder-preserving therapy & cisplatin-based CCRT | 11.1% | KOL input 2020;  Rose 201640 |

**Note:** aOnline only.

**Abbreviations:** CCRT, concurrent chemoradiation therapy; chemo, chemotherapy; KOL, key opinion leader; MIBC, muscle-invasive bladder cancer; OSM, oncology simulation model.

**Table S6.** Bladder Cancer OSM Inputs: MIBC Treatment Efficacya

| Treatment | PFS | Source | OS | Source |
| --- | --- | --- | --- | --- |
| Cisplatin eligible |  |  |  |  |
| Neoadjuvant chemo + radical cystectomy | 77% at 27 months | Iyer 201841 | 63% at 40 months | Iyer 201841 |
| Neoadjuvant and adjuvant chemo + radical cystectomy | 50% at 25 months | Del Bene 201842 | 38% at 60 months | Jue 202043 |
| Radical cystectomy alone | 39% at 60 months | Stein 200129 | 45% at 60 months | Stein 200129 |
| Adjuvant chemo + radical cystectomy | 50% at 25 months | Del Bene 201842 | 38% at 60 months | Jue 202043 |
| Neoadjuvant chemo + partial cystectomy | 50% at 53 months | Ma 201344 | 58% at 53 months | Ma 201344 |
| Bladder-preserving therapy & cisplatin-based CCRT | 47% at 60 months | Fahmy 201845 | 52% at 60 months | Efstathiou 201246 |
| Cisplatin ineligible |  |  |  |  |
| Neoadjuvant chemo + radical cystectomy | 50% at 16 months | Mertens 201247 | 50% at 22 months | Mertens 201247 |
| Neoadjuvant and adjuvant chemo + radical cystectomy | 50% at 25 months | Del Bene 201842 | 38% at 60 months | Jue 202043 |
| Radical cystectomy alone | 39% at 60 months | Stein 200129 | 45% at 60 months | Stein 200129 |
| Adjuvant chemo + radical cystectomy | 50% at 16 months | Mertens 201247 | 50% at 22 months | Mertens 201247 |
| Neoadjuvant chemo + partial cystectomy | 50% at 53 months | Ma 201344 | 58% at 53 months | Ma 201344 |
| Bladder-preserving therapy & cisplatin-based CCRT | 67% at 24 months | James 201248 | 48% at 60 months | James 201248 |

**Note:** aOnline only.

**Abbreviations:** CCRT, concurrent chemoradiation therapy; chemo, chemotherapy; MIBC, muscle-invasive bladder cancer; OS, overall survival; OSM, oncology simulation model; PFS, progression-free survival.

**Table S7.** Bladder Cancer OSM Inputs: la/mUC Treatment Ratesa

| **Parameter** | **Value** | **Source** |
| --- | --- | --- |
| 1L treatment rate | 74.3% | Bamias 201832 |
| 2L treatment rate | 33.9% | Flannery 201925 |
| 3L treatment rate | 35.5% | Sonpavde 201749 |

**Note:** aOnline only.

**Abbreviations:** 1L/2L/3L, first-/second-/third-line; la/mUC, locally advanced or metastatic urothelial carcinoma; OSM, oncology simulation model.

**Table S8.** Bladder Cancer OSM Inputs: la/mUC 1L Treatment Patternsa

| Treatment | 2016 | 2017 | 2018 | 2019 | 2020 | 2021 | Source |
| --- | --- | --- | --- | --- | --- | --- | --- |
| Gemcitabine + cisplatin | 38% | 35% | 33% | 32% | 23% | 17% | Flannery 201925; Seagen 202050 |
| Gemcitabine + carboplatin | 38% | 34% | 32% | 31% | 23% | 17% | Flannery 201925; Seagen 202050 |
| Paclitaxel + carboplatin | 13% | 12% | 11% | 11% | 8% | 6% | Flannery 201925; Seagen 202050 |
| Gemcitabine | 12% | 11% | 10% | 10% | 7% | 5% | Flannery 201925; Seagen 202050 |
| Atezolizumab | 0% | 4% | 7% | 9% | 10% | 10% | Flannery 201925; Seagen 202050 |
| Pembrolizumab | 0% | 4% | 7% | 9% | 10% | 10% | Flannery 201925; Seagen 202050 |
| Maintenance avelumab | 0% | 0% | 0% | 0% | 20% | 36% | Flannery 201925; Seagen 202050 |

**Note:** aOnline only.

**Abbreviations:** 1L, first-line; la/mUC, locally advanced or metastatic urothelial carcinoma; OSM, oncology simulation model.

**Table S9.** Bladder Cancer OSM Inputs: la/mUC 1L Treatment Efficacya

| **Treatment** | **PFS** | **Source** | **OS** | **Source** |
| --- | --- | --- | --- | --- |
| **Gemcitabine + cisplatin** | 50% at 8 months | Roberts 200651 | 50% at 14 months | Roberts 200651 |
| **Gemcitabine + carboplatin** | 50% at 6 months | De Santis 201252 | 50% at 9 months | De Santis 201252 |
| **Paclitaxel + carboplatin** | 35% at 9 months | Zielinski 199853 | 83% at 9 months | Zielinski 199853 |
| **Gemcitabine** | 50% at 5 months | Standler 199754 | 50% at 14 months | Standler 199754 |
| **Atezolizumab** | 50% at 3 months | Balar 2017 (IMvigor210)55 | 50% at 16 months | Balar 2017 (IMvigor210)55 |
| **Pembrolizumab** | 50% at 2 months | Balar 2017  (KEYNOTE-052)56 | 50% at 11 months | O’Donnell 201957 |
| **Maintenance avelumab** | 50% at 4 months | Powles 202058 | 50% at 21 months | Powles 202058 |

**Note:** aOnline only.

**Abbreviations:** 1L, first-line; la/mUC, locally advanced or metastatic urothelial carcinoma; OS, overall survival; OSM, oncology simulation model; PFS, progression-free survival.

**Table S10.** Bladder Cancer OSM Inputs: la/mUC 2L Treatment Patternsa

| Treatment | 2016 | 2017 | 2018 | 2019 | 2020 | 2021 | Source |
| --- | --- | --- | --- | --- | --- | --- | --- |
| Platinum chemotherapy | 45% | 32% | 25% | 20% | 12% | 12% | Flannery 201925; Seagen 202050 |
| Non-platinum chemotherapy | 55% | 40% | 31% | 24% | 14% | 15% | Flannery 201925; Seagen 202050 |
| Pembrolizumab | 0% | 10% | 16% | 21% | 32% | 37% | Flannery 201925; Seagen 202050 |
| Atezolizumab | 0% | 10% | 16% | 21% | 16% | 0% | Flannery 201925; Seagen 202050 |
| Avelumab (2L) | 0% | 3% | 4% | 5% | 6% | 5% | Flannery 201925; Seagen 202050 |
| Nivolumab | 0% | 3% | 4% | 5% | 6% | 5% | Flannery 201925; Seagen 202050 |
| Erdafitinib | 0% | 2% | 3% | 4% | 5% | 7% | Flannery 201925; Seagen 202050 |
| Enfortumab vedotin | 0% | 0% | 0% | 0% | 9% | 20% | Flannery 201925; Seagen 202050 |

aOnline only.

2L, second-line; la/mUC, locally advanced or metastatic urothelial carcinoma; OSM, oncology

**Table S11.** Bladder Cancer OSM Inputs: la/mUC 2L Treatment Efficacya

| Treatment | PFS | Source | OS | Source |
| --- | --- | --- | --- | --- |
| Platinum chemotherapy | 50% at 6 months | De Santis 201252; Roberts 200651; Zielinski 199853 | 50% at 14 months | De Santis 201252; Roberts 200651; Zielinski 199853 |
| Non-platinum chemotherapy | 50% at 3 months | Lorusso 199859; Petrylak 201860; Sideris 201661; Benjamin 201462 | 50% at 6 months | Lorusso 199859; Petrylak 201860; Sideris 201661; Benjamin 201462 |
| Pembrolizumab | 50% at 2 months | Bellmunt 201763 | 50% at 10 months | Bellmunt 201763 |
| Atezolizumab | 50% at 2 months | Powles 201864 | 50% at 11 months | Powles 201864 |
| Avelumab (2L) | 50% at 3 months | Apolo 201765 | 50% at 14 months | Apolo 201765 |
| Nivolumab | 50% at 2 months | Galsky 202066 | 50% at 9 months | Galsky 202066 |
| Erdafitinib | 50% at 6 months | Loriot 201967 | 50% at 14 months | Loriot 201967 |
| Enfortumab vedotin | 50% at 6 months | Rosenberg 201968 | 50% at 12 months | Rosenberg 201968 |

**Note:** aOnline only.

**Abbreviations:** 2L, second-line; la/mUC, locally advanced or metastatic urothelial carcinoma; OS, overall survival; OSM, oncology simulation model; PFS, progression-free survival.

**Table S12.** Bladder Cancer OSM Inputs: la/mUC 3L Treatment Patternsa

| **Treatment** | **2016** | **2017** | **2018** | **2019** | **2020** | **2021** | **Source** |
| --- | --- | --- | --- | --- | --- | --- | --- |
| 3L basketb | 100% | 100% | 100% | 94% | 56% | 48% | Seagen 202050 |
| Erdafitinib | 0% | 0% | 0% | 6% | 11% | 13% | Seagen 202050 |
| Sacituzumab govitecan | 0% | 0% | 0% | 0% | 0% | 5% | Seagen 202050 |
| Enfortumab vedotin | 0% | 0% | 0% | 0% | 33% | 34% | Seagen 202050 |

**Notes:** aOnline only. b3L basket includes docetaxel combinations, paclitaxel combinations, gemcitabine + carboplatin, gemcitabine + cisplatin, miscellaneous off-label treatments.

**Abbreviations:** 3L, third-line; la/mUC, locally advanced or metastatic urothelial carcinoma; OSM, oncology simulation model.

**Table S13.** Bladder Cancer OSM Inputs: la/mUC 3L Treatment Efficacya

| **Treatment** | **PFS** | **Source** | **OS** | **Source** |
| --- | --- | --- | --- | --- |
| 3L basketb | 50% at 4 months | Sonpavde 201749 | 50% at 6 months | Sonpavde 201749 |
| Erdafitinib | 50% at 6 months | Loriot 201967 | 50% at 14 months | Loriot 201967 |
| Sacituzumab govitecan | 50% at 5 months | Tagawa 202169 | 50% at 11 months | Tagawa 202169 |
| Enfortumab  vedotin | 50% at 6 months | Rosenberg 201968 | 50% at 12 months | Rosenberg 201968 |

**Notes:** aOnline only. b3L basket includes docetaxel combinations, paclitaxel combinations, gemcitabine + carboplatin, gemcitabine + cisplatin, miscellaneous off-label treatments.

**Abbreviations:** 3L, third-line; la/mUC, locally advanced or metastatic urothelial carcinoma; OS, overall survival; OSM, oncology simulation model; PFS, progression-free survival.

# Additional references

30. Weiss NS, Koepsell TD. *Epidemiologic Methods: Studying the Occurrence of Illness.* Oxford, UK: Oxford University Press; 2014.

31. Central Intelligence Agency. "North America: United States". Thw World Factbook Web site. https://www.cia.gov/the-world-factbook/countries/united-states/. Published 2020. Accessed June 16, 2020.

32. Bamias A, Tzannis K, Harshman LC, et al. Impact of contemporary patterns of chemotherapy utilization on survival in patients with advanced cancer of the urinary tract: a Retrospective International Study of Invasive/Advanced Cancer of the Urothelium (RISC). *Ann Oncol.* 2018;29(2):361-369.

33. Kamat AM, Lerner SP, O'Donnell M, et al. Evidence-based Assessment of Current and Emerging Bladder-sparing Therapies for Non-muscle-invasive Bladder Cancer After Bacillus Calmette-Guerin Therapy: A Systematic Review and Meta-analysis. *Eur Urol Oncol.* 2020;3(3):318-340.

34. Canter D, Viterbo R, Kutikov A, et al. Baseline renal function status limits patient eligibility to receive perioperative chemotherapy for invasive bladder cancer and is minimally affected by radical cystectomy. *Urology.* 2011;77(1):160-166.

35. Ravvaz K, Walz ME, Weissert JA, Downs TM. Predicting Nonmuscle Invasive Bladder Cancer Recurrence and Progression in a United States Population. *J Urol.* 2017;198(4):824-831.

36. Nielsen ME, Smith AB, Pruthi RS, et al. Reported use of intravesical therapy for non-muscle-invasive bladder cancer (NMIBC): results from the Bladder Cancer Advocacy Network (BCAN) survey. *BJU Int.* 2012;110(7):967-972.

37. Sylvester RJ, Oosterlinck W, Holmang S, et al. Systematic Review and Individual Patient Data Meta-analysis of Randomized Trials Comparing a Single Immediate Instillation of Chemotherapy After Transurethral Resection with Transurethral Resection Alone in Patients with Stage pTa-pT1 Urothelial Carcinoma of the Bladder: Which Patients Benefit from the Instillation? *Eur Urol.* 2016;69(2):231-244.

38. Lamm DL, Blumenstein BA, Crissman JD, et al. Maintenance bacillus Calmette-Guerin immunotherapy for recurrent TA, T1 and carcinoma in situ transitional cell carcinoma of the bladder: a randomized Southwest Oncology Group Study. *J Urol.* 2000;163(4):1124-1129.

39. Malmstrom PU, Sylvester RJ, Crawford DE, et al. An individual patient data meta-analysis of the long-term outcome of randomised studies comparing intravesical mitomycin C versus bacillus Calmette-Guerin for non-muscle-invasive bladder cancer. *Eur Urol.* 2009;56(2):247-256.

40. Rose TL, Deal AM, Ladoire S, et al. Patterns of Bladder Preservation Therapy Utilization for Muscle-Invasive Bladder Cancer. *Bladder Cancer.* 2016;2(4):405-413.

41. Iyer G, Balar AV, Milowsky MI, et al. Multicenter Prospective Phase II Trial of Neoadjuvant Dose-Dense Gemcitabine Plus Cisplatin in Patients With Muscle-Invasive Bladder Cancer. *J Clin Oncol.* 2018;36(19):1949-1956.

42. Del Bene G, Calabro F, Giannarelli D, et al. Neoadjuvant vs. Adjuvant Chemotherapy in Muscle Invasive Bladder Cancer (MIBC): Analysis From the RISC Database. *Front Oncol.* 2018;8(463):463.

43. Jue JS, Koru-Sengul T, Miao F, et al. Neoadjuvant versus adjuvant chemotherapy for muscle-invasive bladder cancer: a propensity matched analysis. *Minerva Urol Nephrol.* 2021;73(5):572-580.

44. Ma B, Li H, Zhang C, et al. Lymphovascular invasion, ureteral reimplantation and prior history of urothelial carcinoma are associated with poor prognosis after partial cystectomy for muscle-invasive bladder cancer with negative pelvic lymph nodes. *Eur J Surg Oncol.* 2013;39(10):1150-1156.

45. Fahmy O, Khairul-Asri MG, Schubert T, et al. A systematic review and meta-analysis on the oncological long-term outcomes after trimodality therapy and radical cystectomy with or without neoadjuvant chemotherapy for muscle-invasive bladder cancer. *Urol Oncol.* 2018;36(2):43-53.

46. Efstathiou JA, Spiegel DY, Shipley WU, et al. Long-term outcomes of selective bladder preservation by combined-modality therapy for invasive bladder cancer: the MGH experience. *Eur Urol.* 2012;61(4):705-711.

47. Mertens LS, Meijer RP, Kerst JM, et al. Carboplatin based induction chemotherapy for nonorgan confined bladder cancer--a reasonable alternative for cisplatin unfit patients? *J Urol.* 2012;188(4):1108-1113.

48. James ND, Hussain SA, Hall E, et al. Radiotherapy with or without chemotherapy in muscle-invasive bladder cancer. *N Engl J Med.* 2012;366(16):1477-1488.

49. Sonpavde G, Pond GR, Mullane S, et al. Outcomes in patients with advanced urothelial carcinoma after discontinuation of programmed death (PD)-1 or PD ligand 1 inhibitor therapy. *BJU Int.* 2017;119(4):579-584.

50. Expert Opinion. Data on File. In: Seagen, Inc.; 2021.

51. Roberts JT, von der Maase H, Sengelov L, et al. Long-term survival results of a randomized trial comparing gemcitabine/cisplatin and methotrexate/vinblastine/doxorubicin/cisplatin in patients with locally advanced and metastatic bladder cancer. *Ann Oncol.* 2006;17(Suppl 5):v118-122.

52. De Santis M, Bellmunt J, Mead G, et al. Randomized phase II/III trial assessing gemcitabine/carboplatin and methotrexate/carboplatin/vinblastine in patients with advanced urothelial cancer who are unfit for cisplatin-based chemotherapy: EORTC study 30986. *J Clin Oncol.* 2012;30(2):191-199.

53. Zielinski CC, Schnack B, Grbovic M, et al. Paclitaxel and carboplatin in patients with metastatic urothelial cancer: results of a phase II trial. *Br J Cancer.* 1998;78(3):370-374.

54. Stadler WM, Kuzel T, Roth B, Raghavan D, Dorr FA. Phase II study of single-agent gemcitabine in previously untreated patients with metastatic urothelial cancer. *J Clin Oncol.* 1997;15(11):3394-3398.

55. Balar AV, Galsky MD, Rosenberg JE, et al. Atezolizumab as first-line treatment in cisplatin-ineligible patients with locally advanced and metastatic urothelial carcinoma: a single-arm, multicentre, phase 2 trial. *Lancet.* 2017;389(10064):67-76.

56. Balar AV, Castellano D, O'Donnell PH, et al. First-line pembrolizumab in cisplatin-ineligible patients with locally advanced and unresectable or metastatic urothelial cancer (KEYNOTE-052): a multicentre, single-arm, phase 2 study. *Lancet Oncol.* 2017;18(11):1483-1492.

57. O'Donnell PH, Balar AV, Vuky J, et al. KEYNOTE-052: Phase 2 study evaluating first-line pembrolizumab (pembro) in cisplatin-ineligible advanced urothelial cancer (UC)— Updated response and survival results. *J Clin Oncol.* 2019;37(15_suppl):4546-4546.

58. Powles T, Park SH, Voog E, et al. Avelumab Maintenance Therapy for Advanced or Metastatic Urothelial Carcinoma. *N Engl J Med.* 2020;383(13):1218-1230.

59. Lorusso V, Pollera CF, Antimi M, et al. A phase II study of gemcitabine in patients with transitional cell carcinoma of the urinary tract previously treated with platinum. Italian Co-operative Group on Bladder Cancer. *Eur J Cancer.* 1998;34(8):1208-1212.

60. Petrylak DP, de Wit R, Chi KN, et al. Ramucirumab plus docetaxel versus placebo plus docetaxel in patients with locally advanced or metastatic urothelial carcinoma after platinum-based therapy (RANGE): overall survival and updated results of a randomised, double-blind, phase 3 trial. *Lancet Oncol.* 2020;21(1):105-120.

61. Sideris S, Aoun F, Zanaty M, et al. Efficacy of weekly paclitaxel treatment as a single agent chemotherapy following first-line cisplatin treatment in urothelial bladder cancer. *Mol Clin Oncol.* 2016;4(6):1063-1067.

62. Benjamin DJ, Bambury RM, Chaim J, et al. Efficacy of single-agent pemetrexed in platinum refractory metastatic urothelial cancer (mUC). *J Clin Oncol.* 2014;32(4_suppl):322-322.

63. Bellmunt J, de Wit R, Vaughn DJ, et al. Pembrolizumab as Second-Line Therapy for Advanced Urothelial Carcinoma. *N Engl J Med.* 2017;376(11):1015-1026.

64. Powles T, Duran I, van der Heijden MS, et al. Atezolizumab versus chemotherapy in patients with platinum-treated locally advanced or metastatic urothelial carcinoma (IMvigor211): a multicentre, open-label, phase 3 randomised controlled trial. *Lancet.* 2018;391(10122):748-757.

65. Apolo AB, Infante JR, Balmanoukian A, et al. Avelumab, an Anti-Programmed Death-Ligand 1 Antibody, In Patients With Refractory Metastatic Urothelial Carcinoma: Results From a Multicenter, Phase Ib Study. *J Clin Oncol.* 2017;35(19):2117-2124.

66. Galsky MD, Saci A, Szabo PM, et al. Nivolumab in Patients with Advanced Platinum-resistant Urothelial Carcinoma: Efficacy, Safety, and Biomarker Analyses with Extended Follow-up from CheckMate 275. *Clin Cancer Res.* 2020;26(19):5120-5128.

67. Loriot Y, Necchi A, Park SH, et al. Erdafitinib in Locally Advanced or Metastatic Urothelial Carcinoma. *N Engl J Med.* 2019;381(4):338-348.

68. Rosenberg JE, O'Donnell PH, Balar AV, et al. Pivotal Trial of Enfortumab Vedotin in Urothelial Carcinoma After Platinum and Anti-Programmed Death 1/Programmed Death Ligand 1 Therapy. *J Clin Oncol.* 2019;37(29):2592-2600.

69. Tagawa ST, Balar AV, Petrylak DP, et al. TROPHY-U-01: A Phase II Open-Label Study of Sacituzumab Govitecan in Patients With Metastatic Urothelial Carcinoma Progressing After Platinum-Based Chemotherapy and Checkpoint Inhibitors. *J Clin Oncol.* 2021;39(22):2474-2485.
